# Supplementary material for: Maternal alcohol use disorder and child school attendance outcomes for non-Indigenous and Indigenous children in Western Australia: a population cohort record linkage study
Source: PubMed Central journal article supplement — BMJ Open. 2017 Jul 11;7(7):e015650. doi: 10.1136/bmjopen-2016-015650 (PMC5734575; doi:10.1136/bmjopen-2016-015650), 2017-07-11
Supplement: bmjopen-2016-015650supp001.pdf [file bmjopen-2016-015650supp001.pdf]

Supplementary material

Table 1. In-scope ICD9/10 alcohol related diagnoses

| <b>Alcohol diagnoses<sup>a</sup></b>                 | <b>ICD10 codes</b>                         | <b>ICD9 codes</b>                   |
|------------------------------------------------------|--------------------------------------------|-------------------------------------|
| Mental and behavioural disorders                     |                                            |                                     |
| Acute alcohol intoxication                           | F10.0; F10.1                               | 303.0–303.03; 305.0–305.03          |
| Alcohol dependence syndrome                          | F10.2                                      | 303.9–303.93                        |
| Alcohol withdrawal                                   | F10.3; F10.4                               | 291.0; 291.81                       |
| Alcohol psychotic disorder                           | F10.5                                      | 291.3; 291.5                        |
| Alcohol amnesic syndrome                             | F10.6                                      | 291.1                               |
| Residual and late-onset alcohol psychiatric disorder | F10.7                                      | 291.2; 291.4                        |
| Other                                                | F10.8; F10.9                               | 291.82; 291.89; 291.9               |
| Alcohol-related diseases                             |                                            |                                     |
| Alcoholic pseudo-Cushing syndrome                    | E24.4                                      | 255.0                               |
| Alcoholic nervous system degeneration                | G31.2                                      | 331.7                               |
| Alcoholic polyneuropathy                             | G62.1                                      | 357.5                               |
| Alcoholic myopathy                                   | G72.1                                      | 359.4                               |
| Alcoholic cardiomyopathy                             | I42.6                                      | 425.5                               |
| Alcoholic gastritis                                  | K29.2                                      | 535.30; 535.31                      |
| Alcoholic liver disease                              | K70–K70.9                                  | 571.0–571.3                         |
| Alcoholic pancreatitis                               | K86.0                                      | 577.1                               |
| 'Other' alcohol disorders                            |                                            |                                     |
| Infant damage due to alcohol <sup>b</sup>            | O35.4; P04.3; Q86.0                        | 655.43; 760.71                      |
| Other                                                | R78.0; T51; T51.0; T51.8; T51.9; Y90–Y90.9 | 790.3; 980.0; 980.8; 980.9; E860.00 |
| Poisoning                                            | X45; X65; Y15                              | E86.09; E950.09; E98.05             |

|                                                      |                      |                       |
|------------------------------------------------------|----------------------|-----------------------|
| Rehabilitation/history of alcohol use disorder       | Z50.2; Z71.4; Z86.41 | V57.89, V65.42, V11.3 |
| Encountering health services due to alcohol problems | Z72.1                | –                     |

---

<sup>a</sup> Some women may have more than one diagnosis.

<sup>b</sup> Recorded on maternal record.

Reprinted with permission from *Heavy maternal alcohol consumption and cerebral palsy in the offspring* by O'Leary, C. M., Watson, I., D'Antoine, H., Stanley, F. and Bower, C. (2012), *Developmental Medicine & Child Neurology*, 54: 224–230

Table 2. Coding of timing of maternal alcohol-related diagnosis in relation to pregnancy

|                        | Timing of maternal alcohol related diagnosis in relation to pregnancy |                     |                       |                       |                       |
|------------------------|-----------------------------------------------------------------------|---------------------|-----------------------|-----------------------|-----------------------|
|                        | During                                                                | ≤1 yr pre-pregnancy | ≤1 yr after pregnancy | > yr before pregnancy | >1 yr after pregnancy |
| During pregnancy       | <b>Yes</b>                                                            | Possible            | Possible              | Possible              | Possible              |
| ≤ 1 yr pre pregnancy   | No                                                                    | <b>Yes</b>          | Possible              | Possible              | Possible              |
| ≤ 1 yr after pregnancy | No                                                                    | No                  | <b>Yes</b>            | Possible              | Possible              |
| >1 yr before pregnancy | No                                                                    | No                  | No                    | <b>Yes</b>            | Possible              |
| >1 yr after pregnancy  | No                                                                    | No                  | No                    | No                    | <b>Yes</b>            |

Reprinted with permission from *Heavy maternal alcohol consumption and cerebral palsy in the offspring* by O'Leary, C. M., Watson, I., D'Antoine, H., Stanley, F. and Bower, C. (2012), *Developmental Medicine & Child Neurology*, 54: 224–230
